# Supplementary material for: Stress and Coping Mechanism among Students Residing in Private School Hostels
Source: Hindawi journal article supplement (doi:10.1155/2023/6535583), 2023-05-22
Supplement: f1 [file 6535583.f1.docx]

**Title: Stress and coping mechanism among the students residing in private school hostel of Nepal**

**Supplementary Table 1 Perceived Stress Respondents (n=209)** (*IQR = Interquartlie range*)

| Statement | Never | Almost Never | Sometime | Fairly Often | Very Often | Median  (IQR) |
| --- | --- | --- | --- | --- | --- | --- |
| 1. Been upset because of something that happened unexpectedly. | 25 (12%) | 33 (15.8%) | 93 (44.5%) | 18 (8.6%) | 40 (19.1%) | 2 (2) |
| 2. Felt like unable to control the important things in your life. | 52 (24.9%) | 41 (19.6%) | 58 (27.8%) | 25 (12%) | 33 (15.8%) | 2 (3) |
| 3. Felt nervous and “stressed”? | 49 (23.4%) | 40 (19.1%) | 60 (28.7%) | 30 (14.4%) | 30 (14.4%) | 2 (2) |
| 4. Felt confident about your ability to handle your personal problems. | 23 (11.0%) | 20 (9.6%) | 53 (25.4%) | 43 (20.%) | 70 (33.5%) | 3 (2) |
| 5. Felt that things were going your way. | 18 (8.6%) | 29 (13.9%) | 88 (42.1%) | 30 (14.4%) | 44 (21.1%) | 2 (1) |
| 6. Could not cope with all the things that you had to do. | 74 (35.4%) | 36 (17.2%) | 53 (25.4%) | 26 (12.4%) | 20 (9.6%) | 1 (2) |
| 7. Been able to control irritations in your life. | 34 (16.3%) | 35 (16.7%) | 61 (29.2%) | 34 (16.3%) | 45 (21.5%) | 2 (2) |
| 8. Felt that you were on top of things. | 26 (12.4%) | 37 (17.7%) | 66 (31.6%) | 34 (16.3%) | 46 (22%) | 2 (2) |
| 9. Been angered because of things that were outside of your control. | 42 (20.1%) | 34 (16.3%) | 53 (25.4%) | 28 (13.4%) | 52 (24.9%) | 2 (3) |
| 10. Felt difficulties were piling up so high that you could not overcome them. | 69 (33%) | 40 (19.1%) | 64 (30.6%) | 14 (6.7%) | 22 (10.5%) | 1 (2) |
| *Note: 0 = Never, 1 = Almost Never, 2= Sometime, 3 = Fairly Often, 4 = Very Often;* | | | | | | |

**Supplementary Table 2 Multicollinearity test of predictor variables**

| **Model** | **Dependent Variable** | **Independent Variable** | **Collinearity Statistics** | |
| --- | --- | --- | --- | --- |
| **Tolerance** | **VIF** |
| 1 | Grade | Ethnicity | .962 | 1.039 |
| Religion | .861 | 1.161 |
| Father Education | .934 | 1.071 |
| Home visit | .968 | 1.033 |
| Overcrowded room in hostel. | .846 | 1.182 |
| Difference in language of the hostel mate and yourself. | .892 | 1.121 |
| Insufficient financial help from home. | .868 | 1.152 |
| Presence of mischievous elements in the hostel. | .786 | 1.273 |
| Neglect from friends because of physique. | .774 | 1.292 |
| Substandard quality of food. | .955 | 1.047 |
| 2 | Ethnicity | Religion | .877 | 1.140 |
| Father Education | .919 | 1.088 |
| Home visit | .954 | 1.049 |
| Overcrowded room in hostel. | .835 | 1.197 |
| Difference in language of the hostel mate and yourself. | .886 | 1.128 |
| Insufficient financial help from home. | .861 | 1.161 |
| Presence of mischievous elements in the hostel. | .782 | 1.279 |
| Neglect from friends because of physique. | .775 | 1.290 |
| Substandard quality of food. | .956 | 1.046 |
| Grade | .920 | 1.087 |
| 3 | Religion | Father Education | .968 | 1.033 |
| Home visit | .954 | 1.048 |
| Overcrowded room in hostel. | .835 | 1.197 |
| Difference in language of the hostel mate and yourself. | .887 | 1.127 |
| Insufficient financial help from home. | .894 | 1.119 |
| Presence of mischievous elements in the hostel. | .782 | 1.279 |
| Neglect from friends because of physique. | .780 | 1.282 |
| Substandard quality of food. | .955 | 1.047 |
| Grade | .928 | 1.077 |
| Ethnicity | .989 | 1.011 |
| 4 | Father Education | Home visit | .958 | 1.044 |
| Overcrowded room in hostel. | .835 | 1.198 |
| Difference in language of the hostel mate and yourself. | .889 | 1.125 |
| Insufficient financial help from home. | .863 | 1.159 |
| Presence of mischievous elements in the hostel. | .782 | 1.278 |
| Neglect from friends because of physique. | .775 | 1.290 |
| Substandard quality of food. | .959 | 1.043 |
| Grade | .935 | 1.070 |
| Ethnicity | .962 | 1.040 |
| Religion | .899 | 1.113 |
| 5 | Home Visit | Overcrowded room in hostel. | .836 | 1.196 |
| Difference in language of the hostel mate and yourself. | .887 | 1.127 |
| Insufficient financial help from home. | .864 | 1.158 |
| Presence of mischievous elements in the hostel. | .783 | 1.277 |
| Neglect from friends because of physique. | .786 | 1.273 |
| Substandard quality of food. | .960 | 1.041 |
| Grade | .934 | 1.071 |
| Ethnicity | .962 | 1.040 |
| Religion | .854 | 1.172 |
| Father Education | .923 | 1.084 |
| 6 | Overcrowded room in hostel. | Difference in language of the hostel mate and yourself. | .955 | 1.047 |
| Insufficient financial help from home. | .861 | 1.161 |
| Presence of mischievous elements in the hostel. | .842 | 1.188 |
| Neglect from friends because of physique. | .779 | 1.284 |
| Substandard quality of food. | .955 | 1.048 |
| Grade | .932 | 1.073 |
| Ethnicity | .962 | 1.039 |
| Religion | .854 | 1.172 |
| Father Education | .919 | 1.088 |
| Home visit | .955 | 1.047 |
| 7 | Difference in language of the hostel mate and yourself. | Insufficient financial help from home. | .864 | 1.157 |
| Presence of mischievous elements in the hostel. | .782 | 1.279 |
| Neglect from friends because of physique. | .782 | 1.278 |
| Substandard quality of food. | .955 | 1.048 |
| Grade | .926 | 1.080 |
| Ethnicity | .962 | 1.040 |
| Religion | .854 | 1.171 |
| Father Education | .921 | 1.085 |
| Home visit | .955 | 1.047 |
| Overcrowded room in hostel. | .900 | 1.111 |
| 8 | Insufficient financial help from home. | Presence of mischievous elements in the hostel. | .782 | 1.279 |
| Neglect from friends because of physique. | .821 | 1.218 |
| Substandard quality of food. | .954 | 1.048 |
| Grade | .927 | 1.079 |
| Ethnicity | .962 | 1.039 |
| Religion | .886 | 1.129 |
| Father Education | .921 | 1.086 |
| Home visit | .957 | 1.045 |
| Overcrowded room in hostel. | .835 | 1.197 |
| Difference in language of the hostel mate and yourself. | .890 | 1.124 |
| 9 | Presence of mischievous elements in the hostel. | Neglect from friends because of physique. | .876 | 1.141 |
| Substandard quality of food. | .978 | 1.022 |
| Grade | .924 | 1.082 |
| Ethnicity | .962 | 1.040 |
| Religion | .853 | 1.172 |
| Father Education | .919 | 1.088 |
| Home visit | .955 | 1.047 |
| Overcrowded room in hostel. | .899 | 1.113 |
| Difference in language of the hostel mate and yourself. | .886 | 1.128 |
| Insufficient financial help from home. | .861 | 1.162 |
| 10 | Neglect from friends because of physique. | Substandard quality of food. | .968 | 1.033 |
| Grade | .919 | 1.088 |
| Ethnicity | .963 | 1.038 |
| Religion | .860 | 1.163 |
| Father Education | .921 | 1.086 |
| Home visit | .968 | 1.033 |
| Overcrowded room in hostel. | .840 | 1.191 |
| Difference in language of the hostel mate and yourself. | .896 | 1.116 |
| Insufficient financial help from home. | .914 | 1.095 |
| Presence of mischievous elements in the hostel. | .885 | 1.129 |
| 11 | Substandard quality of food. | Grade | .920 | 1.087 |
| Ethnicity | .963 | 1.038 |
| Religion | .853 | 1.172 |
| Father Education | .923 | 1.084 |
| Home visit | .959 | 1.042 |
| Overcrowded room in hostel. | .835 | 1.198 |
| Difference in language of the hostel mate and yourself. | .886 | 1.128 |
| Insufficient financial help from home. | .861 | 1.162 |
| Presence of mischievous elements in the hostel. | .801 | 1.248 |
| Neglect from friends because of physique. | .785 | 1.274 |
